# Supplementary material for: Cytotoxicity of eupatorin in MCF-7 and MDA-MB-231 human breast cancer cells via cell cycle arrest, anti-angiogenesis and induction of apoptosis
Source: PubMed Central journal article supplement (PMC6365513; doi:10.1038/s41598-018-37796-w), 2019-02-06

**Cytotoxicity of eupatorin in MCF-7 and MDA-MB-231 human breast cancer cells via cell cycle arrest, anti-angiogenesis and induction of apoptosis**

Nursyamirah Abd Razak<sup>1</sup>., Nadiah Abu<sup>2</sup>, Wan Yong Ho<sup>3</sup>, Nur Rizi Zamberi<sup>1</sup>, Sheau Wei Tan<sup>1</sup>, Noorjahan Banu Alitheen<sup>4</sup>, Kamariah Long<sup>5</sup>, Swee Keong Yeap<sup>1,6\*</sup>

*<sup>1</sup>Laboratory of Vaccines and Immunotherapeutics, Institute of Bioscience, Universiti Putra Malaysia, Serdang 43400, Selangor, Malaysia.*

*<sup>2</sup>UKM Molecular Biology Institute (UMBI), UKM Medical Centre, Jalan Yaa'cob Latiff, Bandar Tun Razak, Cheras 56000, Kuala Lumpur, Malaysia*

*<sup>3</sup>School of Biomedical Sciences, The University of Nottingham Malaysia Campus, Jalan Broga, Semenyih 43500, Selangor, Malaysia*

*<sup>4</sup>Department of Cell and Molecular Biology, Faculty of Biotechnology and Biomolecular Sciences, Universiti Putra Malaysia, Serdang 43400, Selangor, Malaysia. E-mail: [Nanoorjahan@upm.edu.my](mailto:Nanoorjahan@upm.edu.my)*

*<sup>5</sup>Malaysian Agricultural Research and Development Institute (MARDI), Serdang 43400, Selangor, Malaysia.*

*<sup>6</sup>China-ASEAN College of Marine Sciences, Xiamen University Malaysia, Jalan Sunsuria, Bandar Sunsuria, Sepang 43900, Selangor, Malaysia*

\* Correspondence should be addressed to Swee Keong Yeap

Email: [skyeap2005@gmail.com](mailto:skyeap2005@gmail.com); Tel: +60-3-88006901

Supplementary Table 1 Primers for real-time PCR (qPCR)

| Primers                         | Accession number | Primer sequence            |                            |
|---------------------------------|------------------|----------------------------|----------------------------|
|                                 |                  | Forward (5'-3')            | Reverse (5'-3')            |
| <b>Bax</b>                      | NM_001291428     | TCTGACGGCAACTTCAA<br>CTG   | AGTCCAATGTCCAGCCC<br>ATG   |
| <b>Bak1</b>                     | NM_001188        | CCTGCCCTCTGCTTCTGA         | CTGCTGATGGCGGTAAA<br>AA    |
| <b>HIF1A</b>                    | NM_001243084     | CCGCTGAAACGCCAAAG<br>CCAC  | TTGCGCTTTCAGGGCTT<br>GCG   |
| <b>BCL2L11</b>                  | NM_001204106     | CTGCTGGACACACACAT<br>ACA   | GGGCTGAGGAAACAGA<br>GTAAA  |
| <b>VEGFA</b>                    | NM_001025366     | CAGCACAACAAATGTGA<br>ATGCA | ACACGTCTGCGGATCTT<br>GTACA |
| <b>GAPDH</b>                    | NM_001256799.1   | CACCCACTCCTCCACCT<br>TTG   | CCACCACCCTGTTGCTG<br>TAG   |
| <b><math>\beta</math>-actin</b> | NM_001101.3      | TTCTACAATGAGCTGCG<br>TGTG  | GGGGTGTTGAAGGTCTC<br>AAA   |

**Supplementary Figure 1.** Effect of eupatorin on (A) MCF-10a, (B) MCF-7 and (C) MDA-MB-231 cell cytotoxicity for 24, 48 and 72 hours using MTT assay. Values are expressed as mean±S.D for three independent observations.

Supplementary  
Figure 1.

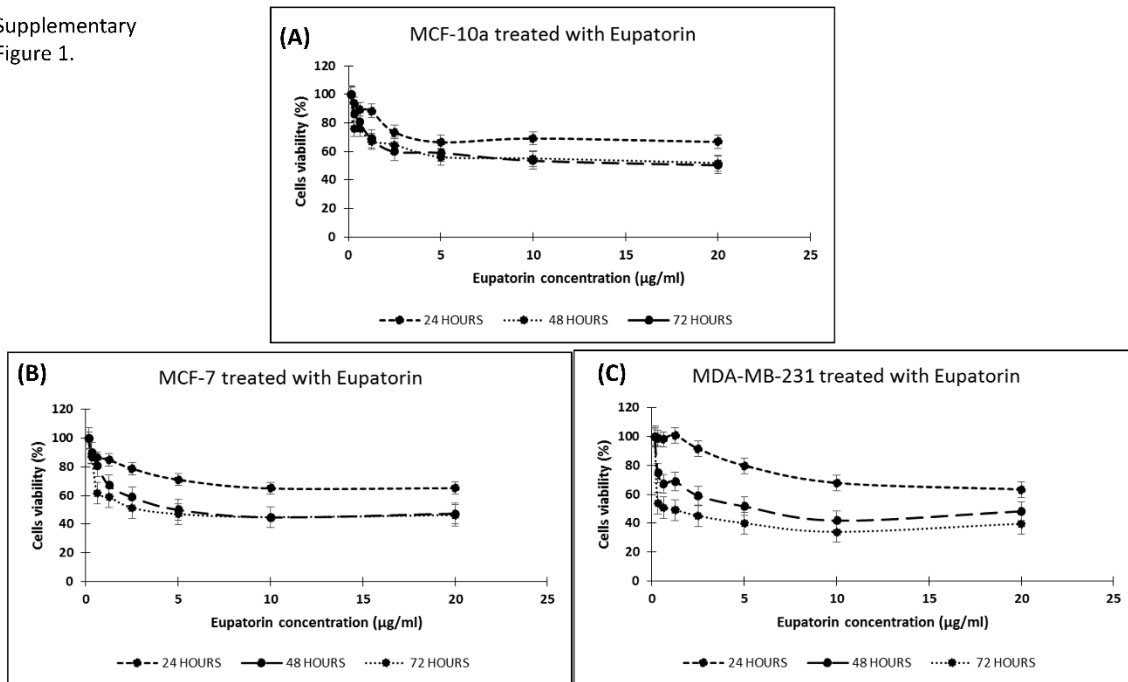

Supplement: 41598_2018_37796_MOESM1_ESM.pdf [file 41598_2018_37796_MOESM1_ESM.pdf]
